# Supplementary material for: Spread of domestic animals across Neolithic western Anatolia: New zooarchaeological evidence from Uğurlu Höyük, the island of Gökçeada, Turkey
Source: PLoS One. 2017 Oct 18;12(10):e0186519. doi: 10.1371/journal.pone.0186519 (PMC5646842; doi:10.1371/journal.pone.0186519)
Supplement: S4 Table — (XLSX) [file pone.0186519.s004.xlsx]

## Sheet: Table S4
	Region	Sub-Region	Site	Approx Dates (cal BC)	Caprines	Bos	Sus	Reference
	Southwest	Southwest	Karain1	18,000-17,000	99.925	0.0375154	0.0375154	Atici 2009
	Southwest		Karain 2	18,000-17,000	99.9722	0	0.0278125	Atici 2009
	Southwest		Öküzini 1	17,800-11,000	99.2773	0	0.722733	Atici 2009
	Southwest		Öküzini 2	17,800-11,000	100	0	0	Atici 2009
	Southwest		Öküzini 3	17,800-11,000	99.312	0	0.68804	Atici 2009
	Southwest		Öküzini 4	12,500-12,100	100	0	0	Atici 2009
	Southwest		Öküzini 5	11,900-11,700	94.9816	0	5.01836	Atici 2009
	Western Coast	Western Coast	Ulucak VI	7000-6400	76.7889	15.7871	7.42397	Arbuckle et al 2014
	Western Coast		Ulucak V	6500-6000	63.5153	17.7798	18.7049	Arbuckle et al 2014
	Western Coast		Ulucak IV	6000-5700	66.1306	16.4717	17.3977	Arbuckle et al 2014
	Western Coast		Çukuriçi VIII	6200-6000	53.2443	27.0038	19.7519	Arbuckle et al 2014
	Northwest	Marmara	Fikirtepe	6500-6000	38.296	59.6771	2.02691	Arbuckle et al 2014
	Northwest		Barçın VI	6500-6000	54.067	43.6432	2.28982	Arbuckle et al 2014
	Northwest		Menteşe Early	6500	16.6667	81.3725	1.96078	Arbuckle et al 2014
	Northwest		Menteşe Middle	6300-6000	49.8492	47.8392	2.31156	Arbuckle et al 2014
	Northwest		Menteşe Late	6000-5500	66.6667	30.8046	2.52874	Arbuckle et al 2014
	Northwest		Ilıpınar X	6000-5800	72.6636	12.1495	15.1869	Arbuckle et al 2014
	Northwest		Ilıpınar IX	5800-5700	53.8856	16.0721	30.0424	Arbuckle et al 2014
	Northwest		Ilıpınar VIII	5700-5600	54.6576	14.2062	31.1362	Arbuckle et al 2014
	Northwest		Ilıpınar VI-IV	5600-5400	52.8215	27.3821	19.7965	Arbuckle et al 2014
	Northwest		Orman Fidanlığı	5500	86.0167	8.02228	5.961	Arbuckle et al 2014
	Northwest	Thrace	Hoca Çeşme	6500-6000	72.6264	21.7016	5.67201	Arbuckle et al 2014
	Northwest	Gökçeada	Uğurlu Höyük V	6500-6000	77.4889	20.4309	2.08024	This study
	Northwest		Uğurlu Höyük IV	5900-5500	86.0759	12.0253	1.89873	This study
	Northwest		Uğurlu Höyük III	5400-5000	87.3096	10.6599	2.03046	This study
	Table S4. List of sites used in this paper with data including region, phase, chronology, author, and relative abundance of Ovis, Capra, Bos and Sus based on %NISP (After Arbuckle et al. 2014).
